# Supplementary material for: Recent advances in the photothermal applications of two-dimensional nanomaterials: photothermal therapy and beyond
Source: Royal Society of Chemistry journal article supplement (doi:10.1039/d1ta04134g), 2021-01-01
Supplement: d1ta04134g1.pdf [file d1ta04134g1.pdf]

## Supplementary Information

**Recent advances in photothermal applications of two-dimensional nanomaterials:  
photothermal therapy and beyond**

*Hui Ma<sup>a,b</sup> and Mianqi Xue<sup>\*a,c</sup>*

*<sup>a</sup> Technical Institute of Physics and Chemistry, Chinese Academy of Sciences, Beijing,  
100190, China.*

*<sup>b</sup> University of Chinese Academy of Sciences, Beijing 100049, China*

*<sup>c</sup> Beijing National Laboratory for Molecular Sciences, Beijing 100190, China.*

*\*Email: [xuemq@mail.ipc.ac.cn](mailto:xuemq@mail.ipc.ac.cn)*

Table S1 Photothermal applications of 2D nanomaterials and their composites.

| Photothermal application | Materials                                                          | Light source                               | Temperature (°C) | Ref. |
|--------------------------|--------------------------------------------------------------------|--------------------------------------------|------------------|------|
|                          | PEGylated GO nanosheets                                            | 2 W cm <sup>-2</sup><br>808 nm NIR light   | 58               | 86   |
|                          | DOX-BSA-rGO nanosheets                                             | 5.5 W cm <sup>-2</sup><br>808 nm NIR light | 58               | 87   |
|                          | indocyanine green-loaded PDA-rGO nanocomposite                     | 0.6 W cm <sup>-2</sup><br>808 nm NIR light | 54               | 93   |
|                          | MnO <sub>x</sub> /TiO <sub>2</sub> -GR-PVP nanocomposites          | 2.0 W cm <sup>-2</sup><br>808 nm NIR light | 60               | 96   |
|                          | SP-Ti <sub>3</sub> C <sub>2</sub> nanosheets                       | 2.0 W cm <sup>-2</sup><br>808 nm NIR light | 55               | 100  |
|                          | Ti <sub>3</sub> C <sub>2</sub> /Au nanocomposite                   | 1 W cm <sup>-2</sup><br>1064 nm NIR light  | 48               | 104  |
|                          | Nb <sub>2</sub> C nanosheets                                       | 1.5 W cm <sup>-2</sup><br>808 nm NIR light | 60               | 107  |
| Photothermal therapy     | MnO <sub>x</sub> /Ta <sub>4</sub> C <sub>3</sub> -SP nanocomposite | 1.5 W cm <sup>-2</sup><br>808 nm NIR light | 50               | 109  |
|                          | SP-Ta <sub>4</sub> C <sub>3</sub> nanosheets                       | 1.5 W cm <sup>-2</sup><br>808 nm NIR light | 52               | 110  |
|                          | PEGylated MoS <sub>2</sub> nanosheets                              | 1 W cm <sup>-2</sup><br>808 nm NIR light   | 60               | 113  |
|                          | MoS <sub>2</sub> /Fe <sub>3</sub> O <sub>4</sub> /PEG composite    | 0.6 W cm <sup>-2</sup><br>808 nm NIR light | 47               | 117  |
|                          | WS <sub>2</sub> @PEI-siRNA composite                               | 1 W cm <sup>-2</sup><br>808 nm NIR light   | 53               | 130  |
|                          | WS <sub>2</sub> /lipid composite                                   | 2 W cm <sup>-2</sup><br>808 nm NIR light   | 60               | 133  |
|                          | TiS <sub>2</sub> /PEG nanosheets                                   | 0.8 W cm <sup>-2</sup><br>808 nm NIR light | 65               | 134  |
|                          | ReS <sub>2</sub> /PEG nanosheets                                   | 0.6 W cm <sup>-2</sup><br>808 nm NIR light | 45               | 137  |
|                          | TaS <sub>2</sub> /PEG nanosheets                                   | 2 W cm <sup>-2</sup><br>808 nm NIR light   | 65               | 138  |

|                                                                              |                                                |    |     |
|------------------------------------------------------------------------------|------------------------------------------------|----|-----|
| SnS <sub>2</sub> nanosheets                                                  | 1.9 W cm <sup>-2</sup><br>808 nm NIR light     | 63 | 140 |
| PEGylated Bi <sub>2</sub> S <sub>3</sub> nanosheets                          | 2 W cm <sup>-2</sup><br>808 nm NIR light       | 50 | 141 |
| BP-PEI-siRNA composite                                                       | 1 W cm <sup>-2</sup><br>808 nm NIR light       | 45 | 161 |
| BP@PEG/Ce6 nanosheets                                                        | 0.65 W cm <sup>-2</sup><br>660 nm NIR light    | 38 | 162 |
| Pd/DOX composite                                                             | 0.6 W cm <sup>-2</sup><br>808 nm NIR light     | 38 | 177 |
| CD-PdNS/ZIF-8 JNP                                                            | 1 W cm <sup>-2</sup><br>1064 nm NIR light      | 60 | 179 |
| MnO <sub>2</sub> -SPs nanosheets                                             | 1.5 W cm <sup>-2</sup><br>808 nm NIR light     | 52 | 181 |
| ferrocene-based MOF (Zr-Fc MOF) nanosheets                                   | 0.1 W cm <sup>-2</sup><br>808 nm NIR light     | 75 | 188 |
| FeMn-LDH/methylene blue composite                                            | 1.0 W cm <sup>-2</sup><br>808 nm NIR light     | 50 | 191 |
| PEGylated B nanosheets                                                       | 2.0 W cm <sup>-2</sup><br>808 nm NIR light     | 37 | 193 |
| Ti nanosheets                                                                | 1.0 W cm <sup>-2</sup><br>808 nm NIR light     | 60 | 194 |
| PEGylated Ge nanosheets                                                      | 1.0 W cm <sup>-2</sup><br>808 nm NIR light     | 54 | 198 |
| wood-GO composite                                                            | 12 kW m <sup>-2</sup><br>simulated solar light | 67 | 48  |
| rGO-MWCNT composite                                                          | 1 kW m <sup>-2</sup><br>simulated solar light  | 78 | 233 |
| Al foil/rGO/Mn <sub>3</sub> O <sub>4</sub> composite                         | 1 kW m <sup>-2</sup><br>simulated solar light  | 42 | 236 |
| MXene/PVDF composite                                                         | 1 kW m <sup>-2</sup><br>simulated solar light  | 75 | 237 |
| SnO <sub>2</sub> -SPM                                                        | simulated solar light                          | 45 | 241 |
| porphyrin-Ti <sub>3</sub> C <sub>2</sub> T <sub>x</sub> MXene Janus membrane | simulated solar light                          | 70 | 242 |

|                           |                                                                                |                                               |     |     |
|---------------------------|--------------------------------------------------------------------------------|-----------------------------------------------|-----|-----|
|                           | PEGylated MoS <sub>2</sub> /cotton cloth composite                             | 1 kW m <sup>-2</sup><br>simulated solar light | 43  | 243 |
|                           | MoS <sub>2</sub> aerogels                                                      | 1 kW m <sup>-2</sup><br>simulated solar light | 60  | 245 |
|                           | melamine-PPy composite                                                         | simulated solar light                         | 43  | 248 |
|                           | Ni <sub>1</sub> Co <sub>3</sub> /PDA nanosheets                                | simulated solar light                         | 36  | 250 |
|                           | TiO <sub>2</sub> -PDA/PPy/cotton composite                                     | 1 kW m <sup>-2</sup><br>simulated solar light | 48  | 253 |
|                           | Ni <sub>3</sub> S <sub>2</sub> /Ni foam                                        | simulated solar light                         | 43  | 257 |
| Thermochemical reaction   | rGO/PPy nanosheets                                                             | 2.6 W cm <sup>-2</sup><br>808 nm NIR light    | 380 | 49  |
| Electrostatic lithography | Ti <sub>3</sub> C <sub>2</sub> T <sub>x</sub> @PEI nanosheets                  | 1.7 W cm <sup>-2</sup><br>808 nm NIR light    | 340 | 275 |
|                           | Mg-Al LDHs matrix and Ru nanoparticles                                         | 300 W Xe lamp                                 | 350 | 276 |
|                           | GO/UiO-66-NH <sub>2</sub> fabrics                                              | 0.6 W cm <sup>-2</sup> simulated solar light  | 80  | 279 |
| Catalysis                 | CuO <sub>x</sub> /ZnO/Al <sub>2</sub> O <sub>3</sub> nanosheets                | simulated sunlight                            | 297 | 283 |
|                           | MoO <sub>3-x</sub> -Ag composite                                               | 0.5 W cm <sup>-2</sup><br>808 nm NIR light    | 55  | 284 |
|                           | Ni/Nb <sub>2</sub> C composite                                                 | 300 W Xe arc lamp                             | 330 | 288 |
|                           | Bi <sub>2</sub> Se <sub>3</sub> /g-C <sub>3</sub> N <sub>4</sub> nanocomposite | 300 W Xe lamp                                 | 190 | 289 |
|                           | PVDF/rGO/graphite-CNT composite                                                | 0.1 W cm <sup>-2</sup><br>NIR light           | 42  | 52  |
| Light-driven actuating    | GO/sodium alginate composite                                                   | 1.35 W cm <sup>-2</sup><br>Xenon lamp         | 50  | 294 |
|                           | MXene/polyethylene composite                                                   | 200 mW cm <sup>-2</sup><br>natural sunlight   | 50  | 298 |
| Sensing                   | BP-Au-Ab composite                                                             | 1.0 W cm <sup>-2</sup><br>808 nm NIR light    | 45  | 300 |

|                        |                                                                     |                                            |     |     |
|------------------------|---------------------------------------------------------------------|--------------------------------------------|-----|-----|
|                        | Ti <sub>3</sub> C <sub>2</sub> T <sub>x</sub> /ionic liquid gel     | 0.45 W<br>808 nm NIR light                 | 256 | 302 |
|                        | Ti <sub>3</sub> C <sub>2</sub> T <sub>x</sub> nanosheets            | NIR light                                  | —   | 303 |
| Photothermal electrode | MoS <sub>2</sub> /PU composite                                      | IR laser                                   | 70  | 54  |
|                        | carbon felt/Ti <sub>3</sub> C <sub>2</sub> T <sub>x</sub> composite | simulated sunlight                         | 30  | 305 |
|                        | PEG/Ti <sub>3</sub> C <sub>2</sub> T <sub>x</sub> composite         | sunlight                                   | 75  | 55  |
| Energy storage         | rGO/PU composite                                                    | 3 kW m <sup>-2</sup> solar light           | 110 | 310 |
|                        | BP/eicosane/PMMA composite                                          | simulated solar light                      | 40  | 311 |
|                        | PVP-MoSe <sub>2</sub> /PNIPAM hydrogel                              | 2.5 W cm <sup>-2</sup><br>808 nm NIR light | 53  | 313 |
| Smart hydrogel         | MXene/PNIPAM hydrogel                                               | 0.8 W<br>808 nm NIR light                  | 48  | 314 |
|                        | PVA/MoS <sub>2</sub> hydrogel                                       | 0.5 W cm <sup>-2</sup><br>808 nm NIR light | 48  | 316 |
| Wearable heater        | AgNP@MXene-PU composite                                             | sunlight                                   | 49  | 320 |
|                        | MXene/PET composite                                                 | 780 nm NIR light                           | 204 | 323 |
|                        | MoS <sub>2</sub> /Au nanocomposites                                 | 808 nm NIR light                           | 60  | 325 |
| Bacteria inhibiting    | Ti <sub>3</sub> C <sub>2</sub> nanosheets                           | 400 mW<br>808 nm NIR light                 | 45  | 326 |
|                        | chitosan-functionalized magnetic GO                                 | 2 W cm <sup>-2</sup><br>808 nm NIR light   | 40  | 327 |
|                        | Ag@BP nanohybrids                                                   | 0.8 W cm <sup>-2</sup><br>808 nm NIR light | 48  | 332 |
| Wound healing          | rGO/PDA composite                                                   | simulated solar light                      | 41  | 336 |
|                        | BP/SF composite                                                     | 808 nm NIR light                           | 58  | 337 |
